# Supplementary material
Source: bioRxiv or medRxiv preprint supplement (https://www.biorxiv.org/highwire/filestream/119040/field_highwire_adjunct_files/0/392324-1.pdf)
Supplement: Supplementary file [file 392324-1.pdf]

# 1 **Supporting Information**

## 2 **Wells et al. (Individual and temporal variation in pathogen load predicts** 3 **long-term impacts of an emerging infectious disease)**

4

### 5 **Detailed description of the modelling framework**

6 We implemented a stochastic individual-based simulation model of coupled Tasmanian devil  
7 demography and devil facial tumour disease (DFTD) epidemiology, for which we provide an  
8 overview of design, concept, and details (Grimm et al. 2006).

#### 9 *Purpose*

10 The purpose of this model is to simulate the impact of DFTD on Tasmanian devil populations  
11 and validate model scenarios of different input parameters (26 model parameters assumed to  
12 be unknown and difficult or impossible to estimate from empirical studies, see **Table S1**) by  
13 matching known system level properties (disease prevalence and population structure)  
14 derived from a wild population studied over ten years after the emergence of DFTD (Hamede  
15 et al. 2015). In particular, running model scenarios for 100 years prior to, and after the  
16 introduction of DFTD, we explored the extent to which DFTD causes devil populations to  
17 decline or become extinct. Moreover, we aimed to explore whether input parameters such as  
18 the latency period of DFTD or the disease transmission frequencies among individuals of  
19 different ages can be identified by matching simulation scenarios to field patterns of devil  
20 demography and disease prevalence.

#### 21 *Entities and state variables*

22 Entities in the model are individuals that move in weekly time steps (movement distance  $\theta$ )  
23 within their home ranges and may potentially engage in disease-transmitting biting behaviour  
24 with other individuals (**Fig. 1**). Free-ranging individuals (i.e. those recruited into the  
25 population after 34 weeks of weaning in pouch and den) are characterized by seven state  
26 variables: sex ( $sex_i$ ), age ( $age_{i,t}$ ), home range centre ( $hr_{x_i} / hr_{y_i}$ ), actual location ( $loc_{x_i} / loc_{y_i}$ ),  
27 time of last reproduction event ( $repT_{i,t}$ ), time of infection with DFTD ( $infT_{i,t}$ ), and tumour  
28 load ( $V_{i,t}$ ). The time of the last female reproduction events informs about the number of  
29 young recruited into the population (conditional that the respective females and their  
30 offspring survive the 34 weeks of pouch and den weaning time). The environment is a  
31 homogenous  $15 \times 15$  km space, in which home range centres of individuals are randomly

32 located (coordinates of home range centres were drawn as random coordinates from a  
33 uniform distribution within the boundaries of the space).

#### 34 *Process overview and scheduling*

35 In each time step (weekly), processes are scheduled in the following order: 1) reproduction of  
36 adult females and males (if the week matches the reproductive season), 2) recruitment of  
37 juveniles into the population, 3) natural death (independent of DFTD), 4) physical interaction  
38 and potential disease transmission, 5) growth of tumours, 6) DFTD-induced death, 7)  
39 movement of individuals, 8) aging of individuals. In the beginning of each time step, the  
40 week is attributed as the corresponding calendar week (with all simulations starting at the  
41 first week of a year) to account for seasonality in mating and reproduction.

42 Birth-death processes are modelled as probabilities according to specified input  
43 parameter values for each scenario. To avoid unrealistically large population sizes  $N_t$ , we  
44 assumed mortality rates for all age classes to gradually increase above a carrying capacity of  
45  $C = 300$  (using the function  $\min(0.1, \kappa + (1 - \kappa) (0.1 / (1 + \exp(-0.01(N_{t-1} - C))))$ ), in which  
46 weekly mortality rates  $\kappa$  increases towards the maximum values of 0.1 if  $N_{t-1} > C$ ; all finite  
47 population size estimates in our case study were below this value (Wells et al. 2017)). The  
48 carrying capacity of 300 individuals in an area of 225 km<sup>2</sup>, or a density of 1.3 km<sup>-2</sup>, is a  
49 typical density of disease-free devil populations (McCallum et al. 2009).

50 The force of infection  $\lambda_{i,t}$ , i.e. the probability that a susceptible individual  $i$  acquires  
51 DFTD at time  $t$  is given as the sum of the probabilities to have DFTD transmitted from any  
52 interacting infected individual  $k$  (with  $k \in 1 \dots K$ , with  $K$  being the number of all individuals in  
53 the population excluding  $i$ ):

$$54 \quad \lambda_{i,t} = \sum_k \beta I_{k,t},$$

55 Here,  $\beta$  is the disease transmission coefficient and  $I_{k,t}$  indicates infectious individuals  $k$ . For  
56 the transmission of DTFD, we may expect that the transmission of tumours depend on  
57 tumour size and also age and reproductive status, since we expect mature and reproductively  
58 active individuals to more often engage in aggressive interactions that may facilitate disease  
59 transmission by increased biting activity. To account for these possibilities we extended the  
60 basic model for  $\lambda_{i,t}$  as follows:

$$61 \quad \lambda_{i,t} = \left[ \sum_{k \in K} \beta_{A(i)} \beta_{A(k)} \left( \frac{N_t}{C} \right)^\delta \left( \frac{1}{1 + (1 - r_{i,t}) \omega} \right) \left( \frac{1}{1 + (1 - r_{k,t}) \omega} \right) \left( \frac{V_{k,t}}{V_{max}} \right)^\gamma \right] I_\eta$$

62 Here, the disease transmission coefficient is composed of two factors  $\beta_{A(i)}$  and  $\beta_{A(k)}$ , each of  
63 which accounts for the age-specific interaction and disease transmission rate for individual  $i$

64 and  $k$  according to their age classes.  $N_t$  is the population size at time  $t$ ; the scaling factor  $\delta$   
 65 accounts for possible increase in interactions frequency with increasing population size if  $\delta >$   
 66 0. The parameter  $r_{i,t}$  is a Boolean indicator of whether an individual recently reproduced and  
 67  $\omega$  is a scaling factor that determines the difference in  $\lambda_{i,t}$  resulting from interactions of  
 68 reproductively active and non-reproducing individuals.  $V_{k,t}$  is the tumour load of individual  $k$ ,  
 69  $V_{max}$  is the maximum tumour load, and  $\gamma$  is a scaling factor of how  $\lambda_{i,t}$  changes with tumour  
 70 load of infected individuals. The parameter  $I_\eta$  is a Boolean indicator of whether two  
 71 individuals are located in a spatial distance  $< \eta$  that allows interaction and disease  
 72 transmission (i.e. only individuals in distances  $< \eta$  can infect each other). We considered  
 73 individuals as ‘reproductively active’ ( $r_{i,t}=1$ ) for eight weeks after a reproduction event.

74 DFTD-induced mortality  $\Omega_{size}$  account for tumour size with tumour size classes ( $< 50$   
 75  $\text{cm}^3$ ,  $50 - 100 \text{ cm}^3$ ,  $> 100 \text{ cm}^3$ ); the magnitudes of  $\Omega_{size}$  as input parameters (i.e. changing  
 76 ‘virulence’) were specified according to the uncertainty of estimates from field data (Wells et  
 77 al. 2017).

78 Tumour growth was modelled as a logistic function with the growth parameter  $\alpha$   
 79 sampled as an input parameter and maximum tumour load set to  $M_{max} = 202 \text{ cm}^2$  according to  
 80 the maximum/asymptotic tumour mass reported elsewhere (Wells et al. 2017). We allowed  
 81 for latency periods  $\tau$  between infection and the onset of tumour growth, which was also  
 82 sampled as an input parameter. We assumed no recovery from DFTD, which appears be very  
 83 rare in the field (Pye et al. 2016). We did not explore the effects of repeated/secondary re-  
 84 introduction of DFTD into the modelled population. While there are currently no quantitative  
 85 information on the spatial spread and metapopulation dynamics of DFTD available, the  
 86 relatively slow geographical spread of DFTD across Tasmania (two decades after emergence,  
 87 some devil populations are still disease free within the ca.  $68 \text{ km}^2$  sized landscape) suggest a  
 88 minor role of re-introductions.

89 The model is stochastic in that demographic rates (survival and reproduction), disease-  
 90 induced death and movement distances for each individual and week are drawn from random  
 91 distributions, assuming Gaussian error of 10% of respective input parameters.

## 92 *Emergence*

93 Transmission of DFTD results from the interaction of susceptible and infected individuals,  
 94 depending on how likely individuals are to interact according to movement patterns, the  
 95 modelled interaction frequencies and disease progression/ tumour load. Population

96 fluctuations and changes in the prevalence of DFTD over time are emerging properties that  
97 result from the coupled demographic and epidemiological dynamics.

98 *Design concepts.* The seasonal demographic birth-death process and tumour growth in the  
99 model follows empirical analysis of devil survival and fecundity and disease progression  
100 from a case study (Wells et al. 2017). Movement of individuals follow expert knowledge  
101 (Hamede et al. 2009) and unpublished studies on the movement behaviour of devils by David  
102 Hamilton and Sebastien Comte (University of Tasmania). DFTD is assumed to be transmitted  
103 during physical interaction that involves biting tumour-carrying individuals.

104 *Simulation scenarios.* We drew  $10^6$  scenarios of random input parameter values using latin  
105 hypercube sampling (Stein 1981) to cover a large range of possible parameter combinations.  
106 All parameters were sampled from uniform distributions with ranges specified in **Table S1**.  
107 Notably, sampled scaling factor values of zero for  $\delta$ ,  $\omega$ , and  $\gamma$  correspond to model scenarios  
108 with homogeneous interactions frequency and disease transmission rates independent of  
109 population size, reproductive status and tumour load, respectively, while values of  $\eta = 21$  km  
110 assume that individuals can infect each other independent of spatial proximity (i.e.  
111 individuals across the entire study area can infect each other). We included in the sampled  
112 parameter space scenarios that excluded *i*) effects of tumour load on infection and survival  
113 propensity, *ii*) effect of spatial proximity on the force of infection between pairs of  
114 individuals and *iii*) both effects of tumour load and spatial proximity in each of 1,000  
115 scenarios. This sampling design was used to explicitly assess the importance of modelling  
116 individual tumour load and space use for accurately representing the system dynamics.

117 For each scenario, we first ran 100 years (520 weeks) of simulations for disease free  
118 populations. For those scenarios in which devil population were stable (i.e. population  
119 always  $> 100$  and  $< 400$  individuals) and juveniles never comprised  $> 50\%$  of the population  
120 (Wells et al. 2017), we introduced DFTD to a random selection of 5% of adult individuals  
121 (tumour sizes of randomly sampled uniformly of sizes  $0.01 \text{ cm}^3$  to  $M_{max}$ ) and then ran another  
122 100 years of simulations. In total, devil populations were stable according to criteria specified  
123 above in 13,523 out of  $10^6$  scenarios (1.35% only).

124 *Computation.* We ran the model in R version 3.4.3 (R Development Core Team 2017).  
125 Computation of  $10^6$  scenarios on 500 parallel nodes on a computer cluster with Xeon CPU  
126 X5650 processor (2.67GHz) took ca. 200 hours.

127

128

129 **Table S1.** Parameter definitions and their values/ sampled ranges for the individual-based  
 130 model of demographic and epidemiological dynamics of Tasmanian devils and devil facial  
 131 tumour disease. Parameters sampled with changing values (drawn from uniform  
 132 distributions) in each scenario are marked with an asterix. The parameter ranges are largely  
 133 defined based on previous analysis of field data (Wells et al. 2017) unless defined otherwise  
 134 in the detailed model descriptions.

| Parameter                                    | Symbol          | Range / Unit                                                                                                                                                                                                          | Description                                                                                                                                                                                                                                                                                                                                                                                                    |
|----------------------------------------------|-----------------|-----------------------------------------------------------------------------------------------------------------------------------------------------------------------------------------------------------------------|----------------------------------------------------------------------------------------------------------------------------------------------------------------------------------------------------------------------------------------------------------------------------------------------------------------------------------------------------------------------------------------------------------------|
| <b>Demography</b>                            |                 |                                                                                                                                                                                                                       |                                                                                                                                                                                                                                                                                                                                                                                                                |
| Carrying capacity                            | $C$             | 300                                                                                                                                                                                                                   | Carrying capacity of the modelled populations above which mortality increase with density.                                                                                                                                                                                                                                                                                                                     |
| Survival rates*                              | $\Phi_{age}$    | $\Phi_{PY}$ : 0.7 – 0.9<br>$\Phi_{DY}$ : 0.7 – 0.9<br>$\Phi_{Juv}$ : 0.4 – 0.9<br>$\Phi_{SA}$ : 0.4 – 0.9<br>$\Phi_{Y1}$ : 0.4 – 0.9<br>$\Phi_{Y2}$ : 0.4 – 0.9<br>$\Phi_{Y3}$ : 0.4 – 0.9<br>$\Phi_{Y5}$ : 0.1 – 0.7 | Annual survival rates for different age groups (weeks of age range given in parenthesis). $\Phi_{PY}$ : pouch young (1 - 17); $\Phi_{DY}$ : young in den (18 - 34); $\Phi_{Juv}$ : juveniles (35-45); SA: subadults (46-51); $\Phi_{Y1}$ : one. year old (52-103); $\Phi_{Y2}$ : two years old (104-155); $\Phi_{Y3}$ : three-four years old (156-259); $\Phi_{Y5}$ : five years old and older ( $\geq 260$ ). |
| Maximum age of survival                      | $MaxAge_{\phi}$ | 7 years                                                                                                                                                                                                               | Maximum age devils can reach in the model; individuals reaching this age will die.                                                                                                                                                                                                                                                                                                                             |
| Reproduction rates (females)*                | $\Psi_{age}$    | $\Psi_{Y1}$ : 0 – 0.2<br>$\Psi_{Y2}$ : 0.5 – 0.99<br>$\Psi_{Y3}$ : 0.5 – 0.99                                                                                                                                         | Probability of a mature female reproducing during the annual breeding season depending on age (weeks of age range given in parenthesis). $\Psi_{Y1}$ : one year old (52-103); $\Psi_{Y2}$ : two years old (104-155); $\Psi_{Y3}$ : three-five years old (156-260).                                                                                                                                             |
| Maximum age of reproduction                  | $MaxAge_{\psi}$ | 5 years                                                                                                                                                                                                               | Maximum age female devils can reproduce.                                                                                                                                                                                                                                                                                                                                                                       |
| Reproduction season                          | $Week_{Repro}$  | Calendar week 8 / 17 (min/max)                                                                                                                                                                                        | Calendar weeks in which female devils may reproduce.                                                                                                                                                                                                                                                                                                                                                           |
| Reproduction interval                        |                 | 45 weeks                                                                                                                                                                                                              | Minimum time period between two reproductive events of females.                                                                                                                                                                                                                                                                                                                                                |
| Movement distance                            | $\theta$        | 2 – 10 km                                                                                                                                                                                                             | Movement distance individuals move away from their home range centre in weekly time steps.                                                                                                                                                                                                                                                                                                                     |
| <b>Epidemiology</b>                          |                 |                                                                                                                                                                                                                       |                                                                                                                                                                                                                                                                                                                                                                                                                |
| Minimum tumour load                          | $m_0$           | 0.0001 cm <sup>2</sup>                                                                                                                                                                                                | Minimum tumour volume at onset of growth.                                                                                                                                                                                                                                                                                                                                                                      |
| Maximum tumour load                          | $M_{max}$       | 202 cm <sup>2</sup>                                                                                                                                                                                                   | Maximum/ asymptotic tumour volume (as used in logistic growth curve).                                                                                                                                                                                                                                                                                                                                          |
| Scale parameter of the logistic growth curve | $\alpha$        | 0.02 – 0.1                                                                                                                                                                                                            | Scale parameter of the logistic growth curve of tumours, given as a value of weekly growth.                                                                                                                                                                                                                                                                                                                    |

|                                                            |                 |                                                                                                                       |                                                                                                                                                                                                                                                                                                                                                                      |
|------------------------------------------------------------|-----------------|-----------------------------------------------------------------------------------------------------------------------|----------------------------------------------------------------------------------------------------------------------------------------------------------------------------------------------------------------------------------------------------------------------------------------------------------------------------------------------------------------------|
| Latency period                                             | $\tau$          | 0 – 150                                                                                                               | Latency period between infection and onset of tumour growth in weeks.                                                                                                                                                                                                                                                                                                |
| DFTD-induced decrease in survival rates                    | $\Omega_{size}$ | $\Omega_1$ : 0.3 – 0.9<br>$\Omega_2$ : 0.1 – 0.6<br>$\Omega_3$ : 0.05 – 0.4                                           | Odds ratios of the decrease in survival of individuals with certain tumour loads compared to uninfected individuals. Tumour load categories are $\Omega_1$ : < 50 cm <sup>3</sup> ; $\Omega_2$ : 50 – 100 cm <sup>3</sup> ; $\Omega_3$ : > 100 cm <sup>3</sup> .                                                                                                     |
| Interaction and disease transmission coefficients          | $\beta_{age}$   | $\beta_{Juv}$ : 0 – 1<br>$\beta_{Y1}$ : 0 – 1<br>$\beta_{Y2}$ : 0 – 1<br>$\beta_{Y3}$ : 0 – 1<br>$\beta_{Y5}$ : 0 – 1 | Interaction and disease transmission coefficients based on the interaction of susceptible and infectious individuals. $\beta_{Juv}$ : juveniles (35-45); SA: subadults (46-51); $\beta_{Y1}$ : one year old (52-103); $\beta_{Y2}$ : two years old (104-155); $\beta_{Y3}$ : three-four years old (156-259); $\beta_{Y5}$ : five years old and older ( $\geq 260$ ). |
| Tumour load – dependence in infection rates                | $\gamma$        | 0 – 3                                                                                                                 | Scaling factor, which determines increases in infection rates with increasing tumour load of infected individuals.                                                                                                                                                                                                                                                   |
| Density - dependence of interaction frequency              | $\delta$        | 0 – 3                                                                                                                 | Scaling factor of possible increase in interactions frequency with increasing population size if $\delta > 0$ .                                                                                                                                                                                                                                                      |
| Reproduction - dependence increase in disease transmission | $\omega$        | 0 – 4                                                                                                                 | Scaling factor, which determines the difference in infection rates resulting from interactions between reproductively active and non-reproducing individuals.                                                                                                                                                                                                        |
| Interaction distance for disease transmission              | $\eta$          | 1 – 21 km                                                                                                             | Distance over which individuals at different locations may interact and eventually transmit disease.                                                                                                                                                                                                                                                                 |

135

136

137

138

139

140

141

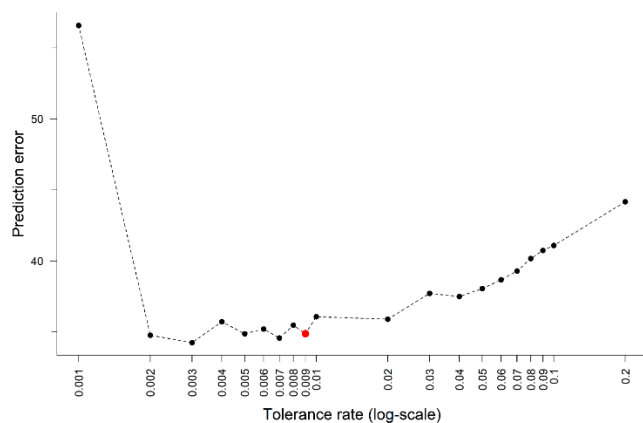

142

143 **Figure S1.** Prediction error for different tolerance rates (subset selection of simulation  
 144 scenarios) for predicting the summary statistics from our case study, using the leave-one-out  
 145 cross validation procedure of the ‘cv4abc’ function in the R package *abc*. Prediction errors  
 146 are calculated using the neural network regression method, sample sizes of  $n=100$  as samples  
 147 sizes for the cross-validation samples and ‘mode’ as measures of central tendency from  
 148 posterior distributions.

149

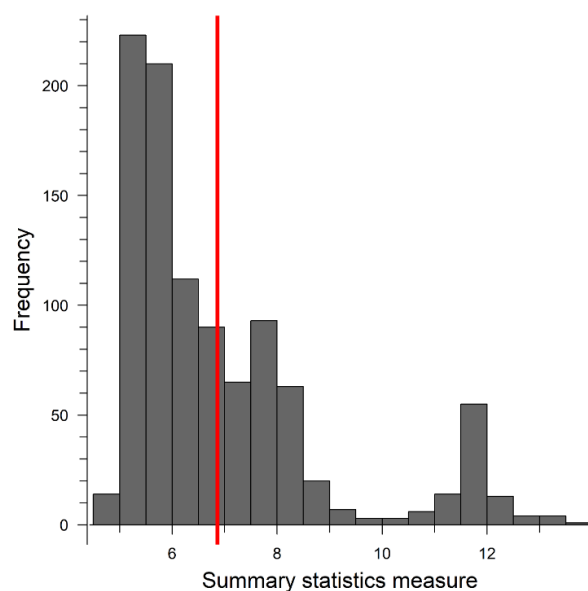

150

151 **Figure S2.** Frequency distribution of summary statistic measures (summed over all different  
 152 summary statistic variables). The red bar shows the value for the summary statistics from our  
 153 case study. Summary and goodness-of-fit test were performed with the ‘gfit’ function of the  
 154 R package *abc*.

155

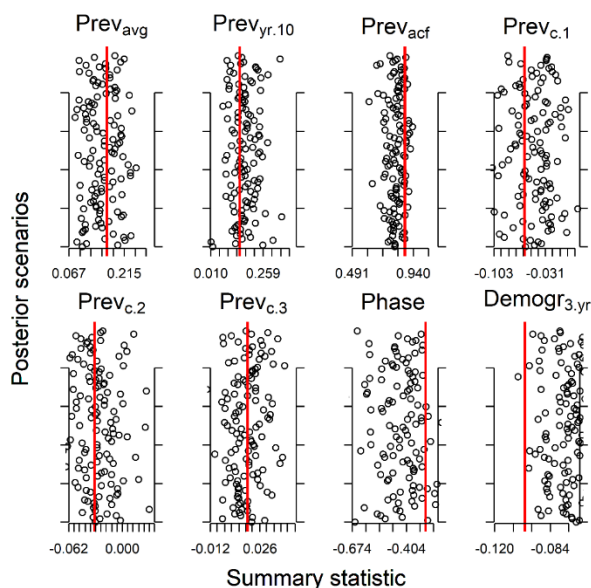

156

157 **Figure S3.** Summary statistic values for the empirical case study (red vertical lines) and each  
 158 of the selected posterior scenarios (points). The horizontal distances between red lines and  
 159 points indicate the differences in summary statistics between those derived from field data  
 160 and those from selected scenarios. Summary statistics are given as **Prev<sub>avg</sub>**: mean DFTD  
 161 prevalence over the course of 10 years; **Prev<sub>yr.10</sub>**: mean DFTD prevalence in the 10<sup>th</sup> year  
 162 only; **Prev<sub>acf</sub>**: autocorrelation value for prevalence values lagged over one time step; **Prev<sub>c.1</sub>**,  
 163 **Prev<sub>c.2</sub>**, **Prev<sub>c.3</sub>**: three coefficients estimates of cubic regression model of the smoothed  
 164 ordered difference in DFTD prevalence (fitting 3<sup>rd</sup> order orthogonal polynomials of time for  
 165 smoothed prevalence values using the loess function in R with degree of smoothing set to  $\alpha =$   
 166 0.75); **Phase**: phase in seasonal population fluctuations as determined by a sinusoidal model  
 167 fit to the trappable population over the course of ten years; **Demogr<sub>3,yr</sub>**: regression coefficient  
 168 of a linear model of the changing proportions of individuals  $\geq 3$  years old in the trappable  
 169 population over the course of ten years.

170

171



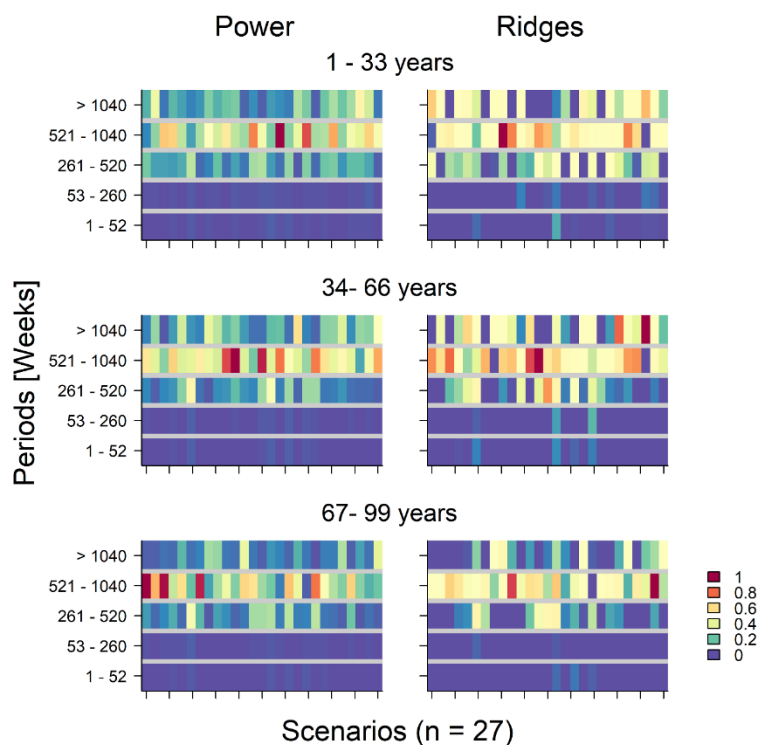

172

173

174

175

176

177

178

179

180

181

182

183

184

**Figure S4.** Relative intensities of wavelet power spectra and the presence of ridges (continuous high intensity of periodicity over time) in different periods and timespans after the introduction of devil facial tumour disease (DFTD) in those scenarios in which DFTD persisted in the population for at least 100 years of simulations ( $n = 61$  out of 121 posterior samples). The different scenarios are plotted as small bars in arbitrary order along the x-axis. Colour spectra from blue to red indicated increasing relative spectral intensities in the different regions of the individual wavelet spectra and the relative presence of ridges (proportion of regions covered by ridges), respectively. Binning of wavelet spectra into regions was done over the five weekly time periods 1-52, 53-260, 261-520, 521-1040, and > 1040 weeks, respectively, and the three timespans 1-33, 34-66, and 67-99 years after the introduction of DFTD.

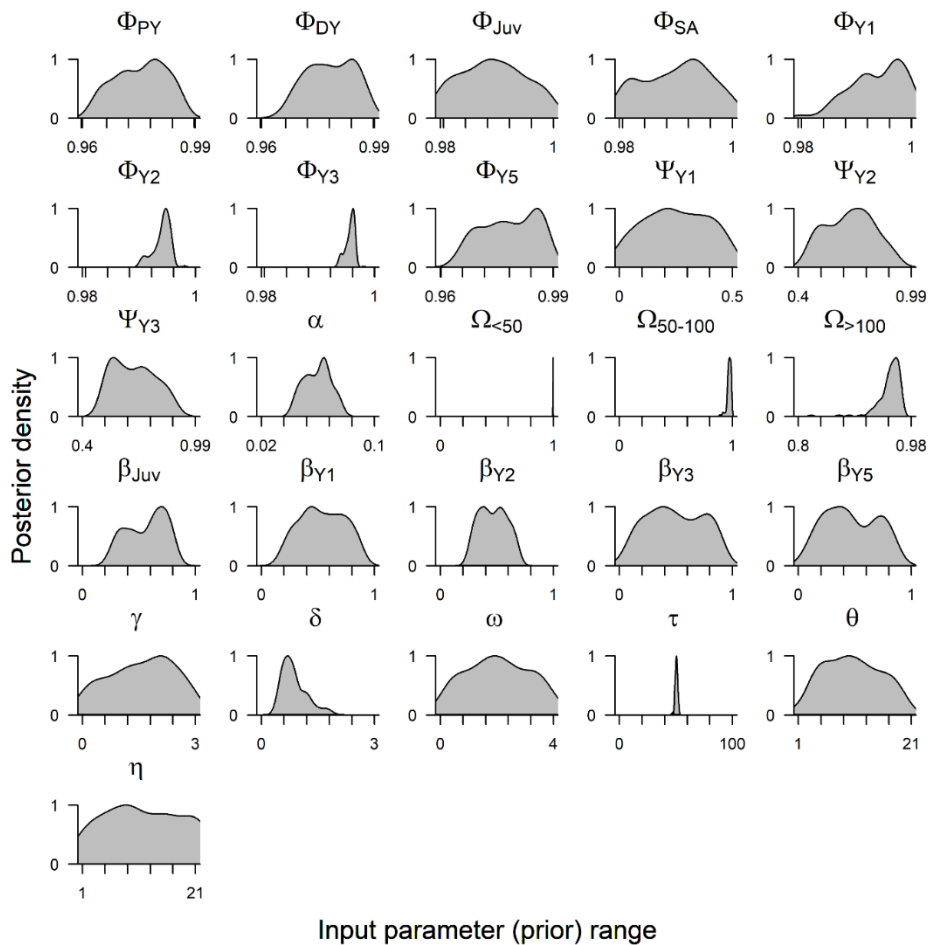

**Figure S5.** Posterior density distributions of parameters sampled in the individual-based model to simulate coupled demographic and epidemiological dynamics of Tasmanian devils and devil facial tumour disease (DFTD). Posterior distributions are based on selected scenarios that best matched population-level trajectories of a devil population studied over ten years. Parameter values were adjusted according to the neural network regression-based Approximate Bayesian Computation approach. The displayed ranges on the x-axes represent the prior range for each parameter (priors were drawn from uniform distributions). Symbology is described in Table S1 numbers of posterior mode and 95% credible intervals are given in Table S2. Note that the posterior distribution for  $\Omega_{<50}$  is poorly visible because all values are close to 1.

202 **Table S2.** Posterior mode and 95% credible intervals (95% CI) of parameters sampled in the  
 203 individual-based model and selected with Approximate Bayesian Computation.  
 204 Mode and 95% CIs are presented for the adjusted parameter values (corresponding to the  
 205 posterior distributions in Figure S5) and unadjusted parameter values. See Table S2 for  
 206 parameter description and the full prior ranges sampled in the simulations.

| Parameter         | Adjusted parameters |               | Unadjusted parameters |               |
|-------------------|---------------------|---------------|-----------------------|---------------|
|                   | Mode                | 95% CI        | Mode                  | 95% CI        |
| $\Phi_{PY}$       | 0.983               | 0.967 - 0.991 | 0.985                 | 0.965 - 0.994 |
| $\Phi_{DY}$       | 0.988               | 0.971 - 0.993 | 0.989                 | 0.967 - 0.995 |
| $\Phi_{Juv}$      | 0.989               | 0.982 - 0.997 | 0.989                 | 0.983 - 0.997 |
| $\Phi_{SA}$       | 0.993               | 0.982 - 0.998 | 0.993                 | 0.983 - 0.997 |
| $\Phi_{Y1}$       | 0.996               | 0.987 - 0.999 | 0.996                 | 0.987 - 0.999 |
| $\Phi_{Y2}$       | 0.994               | 0.991 - 0.995 | 0.995                 | 0.986 - 0.999 |
| $\Phi_{Y3}$       | 0.995               | 0.993 - 0.996 | 0.996                 | 0.987 - 0.999 |
| $\Phi_{Y5}$       | 0.988               | 0.964 - 0.993 | 0.989                 | 0.962 - 0.995 |
| $\Psi_{Y1}$       | 0.214               | 0.011 - 0.491 | 0.225                 | 0.019 - 0.495 |
| $\Psi_{Y2}$       | 0.709               | 0.447 - 0.877 | 0.702                 | 0.402 - 0.954 |
| $\Psi_{Y3}$       | 0.561               | 0.493 - 0.856 | 0.51                  | 0.407 - 0.95  |
| $\alpha$          | 0.064               | 0.043 - 0.075 | 0.075                 | 0.024 - 0.099 |
| $\Omega_{<50}$    | 0.997               | 0.994 - 1     | 0.999                 | 0.991 - 1     |
| $\Omega_{50-100}$ | 0.975               | 0.914 - 1     | 0.987                 | 0.915 - 1     |
| $\Omega_{>100}$   | 0.958               | 0.917 - 0.973 | 0.964                 | 0.881 - 0.992 |
| $\beta_{Juv}$     | 0.70                | 0.29 - 0.81   | 0.793                 | 0.09 - 0.997  |
| $\beta_{Y1}$      | 0.44                | 0.21 - 0.87   | 0.397                 | 0.074 - 0.97  |
| $\beta_{Y2}$      | 0.38                | 0.27 - 0.69   | 0.63                  | 0.024 - 0.97  |
| $\beta_{Y3}$      | 0.39                | 0.11 - 0.89   | 0.45                  | 0.068 - 0.99  |
| $\beta_{Y5}$      | 0.37                | 0.11 - 0.85   | 0.35                  | 0.04 - 1      |
| $\gamma$          | 2.08                | 0.006 - 3.0   | 2.34                  | 0.31 - 2.94   |
| $\delta$          | 0.69                | 0.31 - 1.54   | 0.513                 | 0 - 2.09      |
| $\omega$          | 1.93                | 0.13 - 3.91   | 1.96                  | 0.081 - 3.83  |
| $\tau$            | 50.5                | 48.5 - 52.6   | 58.7                  | 22.9 - 94.3*  |
| $\theta$          | 9.9                 | 2.4 - 19.3    | 9.4                   | 1.2 - 20.2    |
| $\eta$            | 8.7                 | 0.8 - 21      | 9.0                   | 2.6 - 21      |

207

208

209

210

211

212

213

214

215

216

217 **References**

- 218 Grimm, V., U. Berger, F. Bastiansen, S. Eliassen, V. Ginot, J. Giske, J. Goss-Custard, T.  
219 Grand, S. K. Heinz, G. Huse, A. Huth, J. U. Jepsen, C. Jorgensen, W. M. Mooij, B.  
220 Mueller, G. Pe'er, C. Piou, S. F. Railsback, A. M. Robbins, M. M. Robbins, E.  
221 Rossmannith, N. Rueger, E. Strand, S. Souissi, R. A. Stillman, R. Vabo, U. Visser, and  
222 D. L. DeAngelis. 2006. A standard protocol for describing individual-based and  
223 agent-based models. *Ecological Modelling* **198**:115-126.
- 224 Hamede, R. K., J. Bashford, H. McCallum, and M. Jones. 2009. Contact networks in a wild  
225 Tasmanian devil (*Sarcophilus harrisii*) population: using social network analysis to  
226 reveal seasonal variability in social behaviour and its implications for transmission of  
227 devil facial tumour disease. *Ecology Letters* **12**:1147-1157.
- 228 Hamede, R. K., A.-M. Pearse, K. Swift, L. A. Barmuta, E. P. Murchison, and M. E. Jones.  
229 2015. Transmissible cancer in Tasmanian devils: localized lineage replacement and  
230 host population response. *Proceedings of the Royal Society of London B: Biological*  
231 *Sciences* **282**:20151468.
- 232 McCallum, H., M. Jones, C. Hawkins, R. Hamede, S. Lachish, D. L. Sinn, N. Beeton, and B.  
233 Lazenby. 2009. Transmission dynamics of Tasmanian devil facial tumor disease may  
234 lead to disease-induced extinction. *Ecology* **90**:3379-3392.
- 235 Pye, R., R. Hamede, H. V. Siddle, A. Caldwell, G. W. Knowles, K. Swift, A. Kreiss, M. E.  
236 Jones, A. B. Lyons, and G. M. Woods. 2016. Demonstration of immune responses  
237 against devil facial tumour disease in wild Tasmanian devils. *Biology letters* **12**.
- 238 R Development Core Team. 2017. R: A language and environment for statistical computing.  
239 R Foundation for Statistical Computing, Vienna, Austria.
- 240 Stein, M. 1981. Large sample properties of simulations using latin hypercube sampling.  
241 *Technometrics* **29**:143–151.
- 242 Wells, K., R. Hamede, D. H. Kerlin, A. Storfer, P. A. Hohenlohe, M. E. Jones, and H. I.  
243 McCallum. 2017. Infection of the fittest: devil facial tumour disease has greatest  
244 effect on individuals with highest reproductive output. *Ecology Letters* **20**:770–778.

245
